# Supplementary material
Source: PubMed Central journal article supplement (PMC6215764)
Supplement: NIHMS842318-supplement-S1.pdf [file NIHMS842318-supplement-S1.pdf]

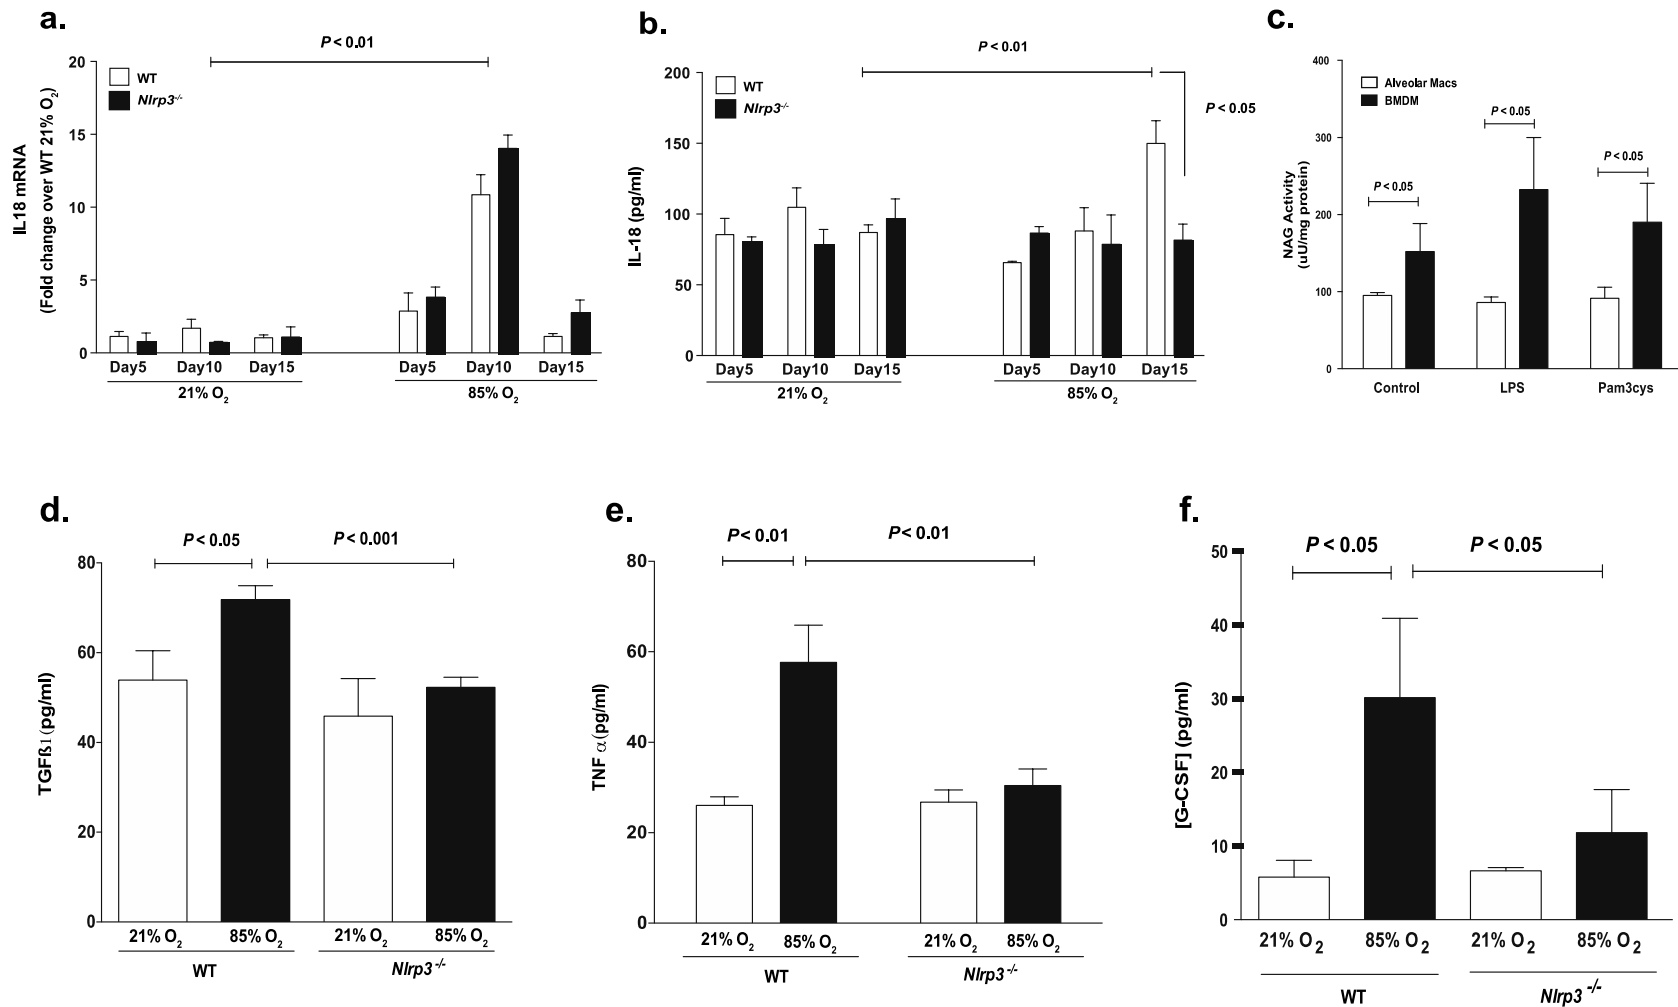

**Supplementary Figure 1:** *Nlrp3*<sup>-/-</sup> mice are protected from increases in IL18, TGFβ1 and TNFα observed with exposure to hyperoxia in WT mice. All data are expressed as mean ± s.e.m., with *n* = 6-12 animals per group for each experiment. (a). Animals kept in 21% O<sub>2</sub> showed no increases in IL18 mRNA. Exposure to 85% O<sub>2</sub> resulted in changes in IL18 mRNA that mimicked those seen with IL1β mRNA, significantly increasing at PN10 in both WT and *Nlrp3*<sup>-/-</sup> mice. (b). IL18 protein increased in the BAL of WT mice exposed to 85% O<sub>2</sub>, but no increases were noted in mice kept in 21% O<sub>2</sub>, or in *Nlrp3*<sup>-/-</sup> mice exposed to 85% O<sub>2</sub>. (c). NAG activity was compared between resident alveolar macrophages and bone marrow-derived macrophages (BMDM) under quiescent conditions and after treatment with LPS or Pam3Cys. Increased NAG activity was only found in BMDM under all three conditions (d, e & f). Exposure to 85% O<sub>2</sub> increased the expression of active TGFβ1 (d), TNFα (e) and G-CSF (f) in the BAL of WT mice obtained on PN15. However, *Nlrp3*<sup>-/-</sup> mice failed to show any increases in TGFβ1, TNFα, or G-CSF with hyperoxia exposure.

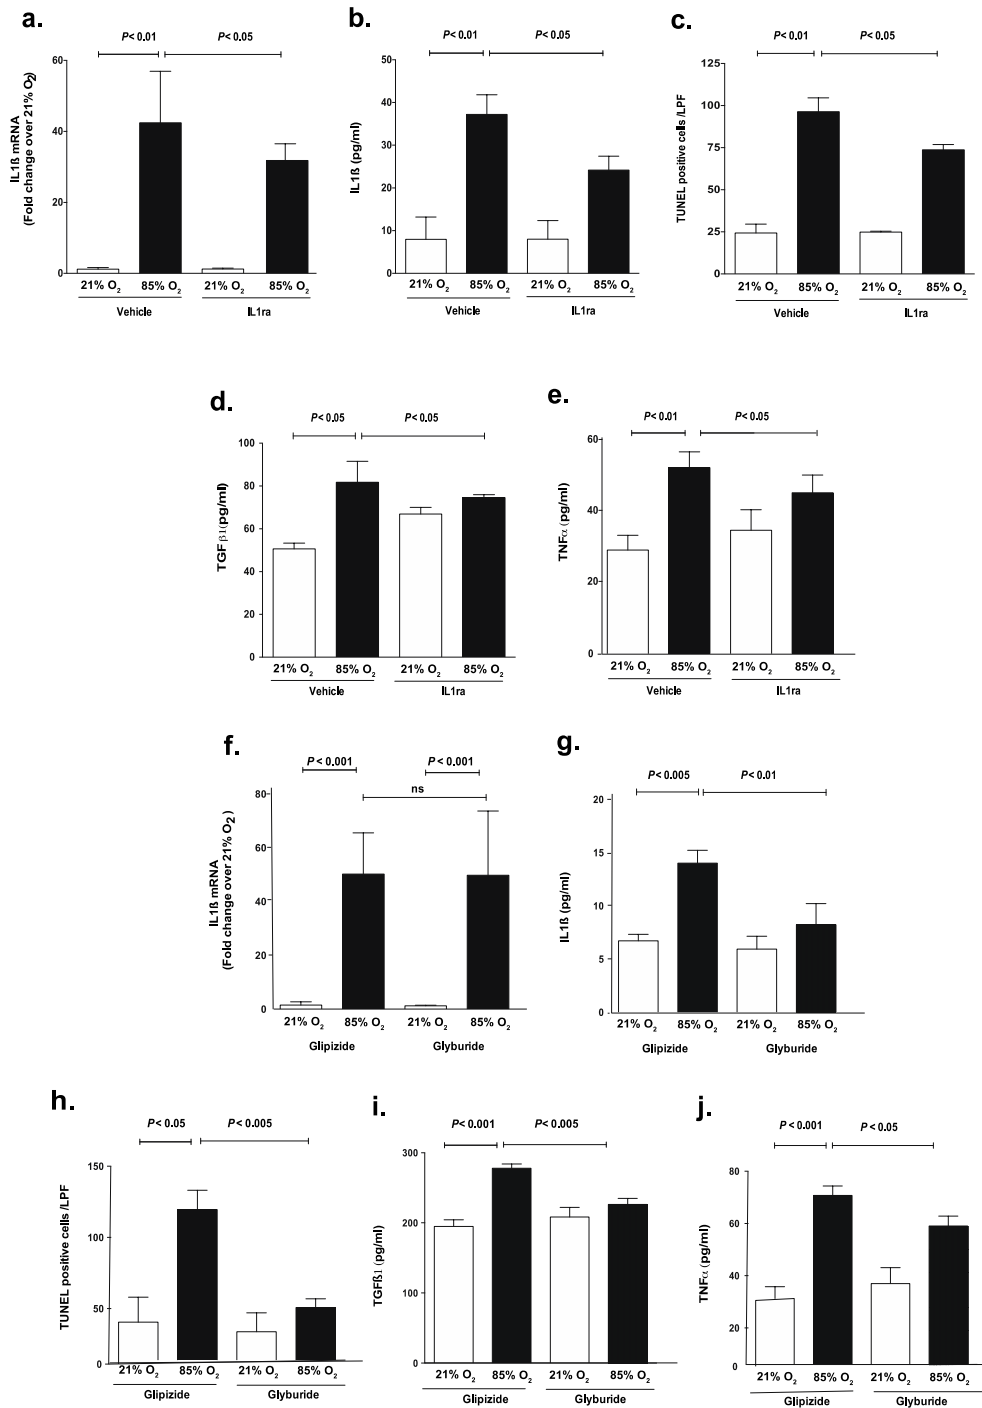

**Supplementary Figure 2:** Effects on IL1 $\beta$  mRNA, IL1 $\beta$  protein, TUNEL-positive cells, TGF $\beta$ 1 and TNF $\alpha$  in WT mice exposed to 21% or 85% O<sub>2</sub> treated with either recombinant IL1ra (**a-e**) or glyburide (**f-j**), using vehicle or glipizide as controls respectively. All data are expressed as mean  $\pm$  s.e.m., with  $n = 6-12$  animals per group for each experiment. (**a**). Exposure to 85% O<sub>2</sub> was associated with increase in IL1 $\beta$  mRNA in both vehicle and IL1ra-treated mice. IL1ra-treated mice had lower IL1 $\beta$  mRNA than vehicle-treated mice exposed to 85% O<sub>2</sub>. (**b**). Exposure to 85% O<sub>2</sub> was associated with increase in IL1 $\beta$  protein in both vehicle and IL1ra-treated mice. IL1ra-treated mice had lower IL1 $\beta$  protein than vehicle-treated mice exposed to 85% O<sub>2</sub>. (**c**). Vehicle-treated mice exposed to 85% O<sub>2</sub> had increased TUNEL-positive cells. Treatment of hyperoxia-exposed mice with IL1ra was associated with a 30% decrease in the number of TUNEL-positive cells. (**d**). Vehicle-treated mice exposed to 85% O<sub>2</sub> had increased TGF $\beta$ 1 whereas IL1ra-treated mice had no increase in TGF $\beta$ 1 with hyperoxia exposure. (**e**). Vehicle-treated mice exposed to 85% O<sub>2</sub> had increased TNF $\alpha$  whereas IL1ra-treated mice had no increase in TNF $\alpha$  with hyperoxia exposure. (**f**). Exposure to 85% O<sub>2</sub> was associated with equally increased IL1 $\beta$  mRNA in both glipizide- and glyburide-treated mice. (**g**). Compared to the two-fold increase in IL1 $\beta$  protein content in glipizide-treated mice in 85% O<sub>2</sub>, glyburide-treated mice had no increase in IL1 $\beta$ . (**h**). Compared to the four-fold increase in TUNEL-positive cells in hyperoxia-exposed mice treated with glipizide, glyburide-treated mice had no increase in TUNEL positive cells. (**i-j**). Glipizide-treated mice exposed to 85% O<sub>2</sub> had increased TGF $\beta$ 1 (**i**) and TNF $\alpha$  (**j**). Glyburide treated hyperoxia-exposed mice did not show any increase in active TGF $\beta$ 1, and had a blunted increase in TNF $\alpha$ .

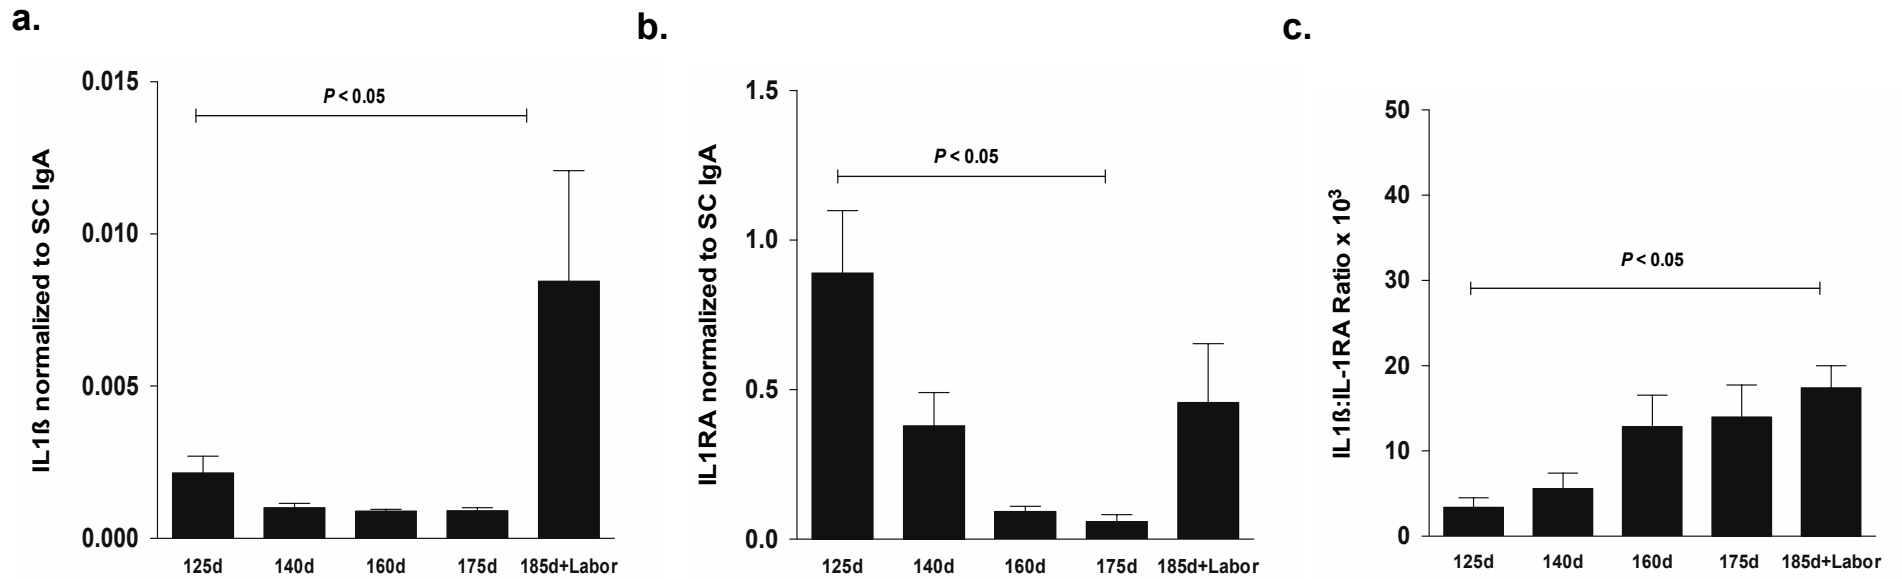

**Supplementary Figure 3:** Ontogeny of lung fluid IL1 $\beta$ , IL1ra and IL1 $\beta$ :IL1ra ratio during non-human primate gestation. Fetal baboons were harvested at specific times during gestation (125 days to 175 days) and at term with the onset of labor (185 days). All data are expressed as mean  $\pm$  s.e.m., with  $n = 6-8$  animals per group for each experiment. **(a)**. IL1 $\beta$  content normalized to SC IgA was low during gestation and increased significantly at term after the onset of labor. **(b)**. IL1ra normalized to SC IgA decreased during gestation, and increased at term after the onset of labor. **(c)**. IL1 $\beta$ :IL1ra ratio gradually increased over time during gestation and was maximally increased at term gestation with labor.

**a.**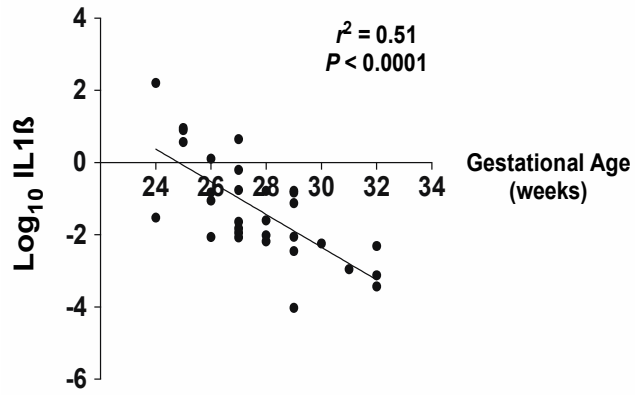**b.**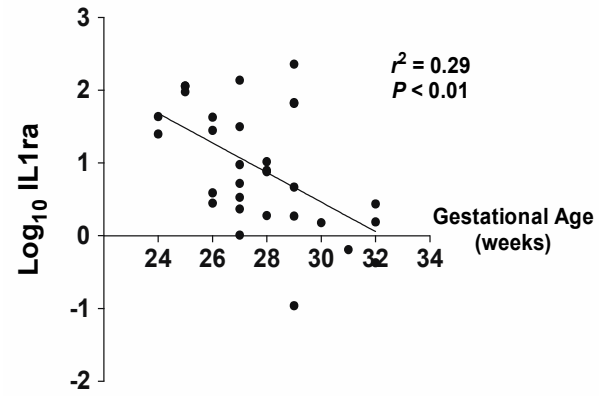**c.**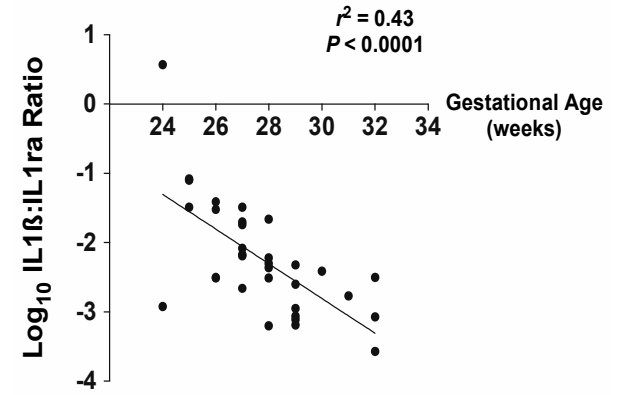

**Supplementary Figure 4:** Correlations of IL1 $\beta$ , IL1ra and IL1 $\beta$ :IL1ra ratio to gestational age. (a-c). Log transformed values of each biomarker from days 1-3 were plotted against gestational age and Pearson correlations determined. Each biomarker was significantly negatively correlated with gestational age.

Full Blot, Fig. 1d:

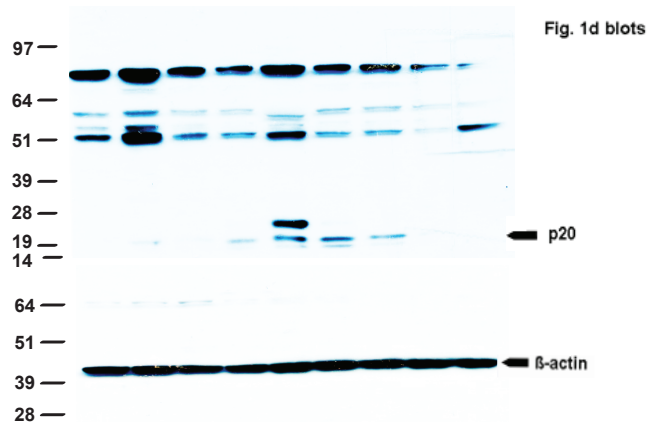

Full Blot, Fig. 2b:

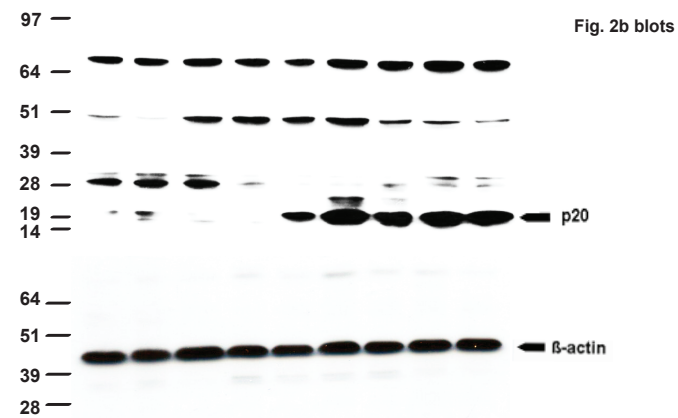

Full Blot, Fig. 2h:

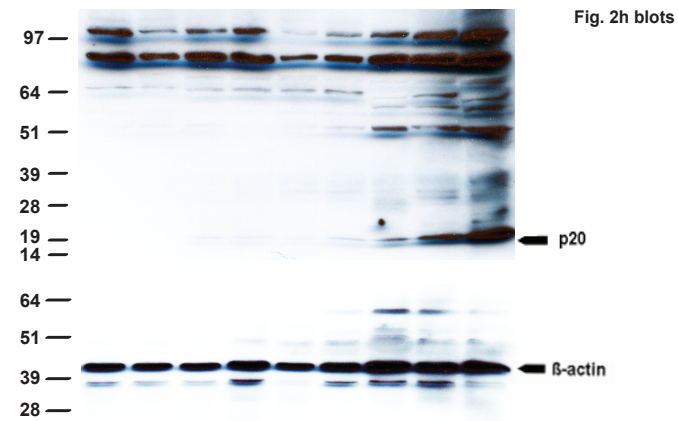

Full Blot, Fig. 3c:

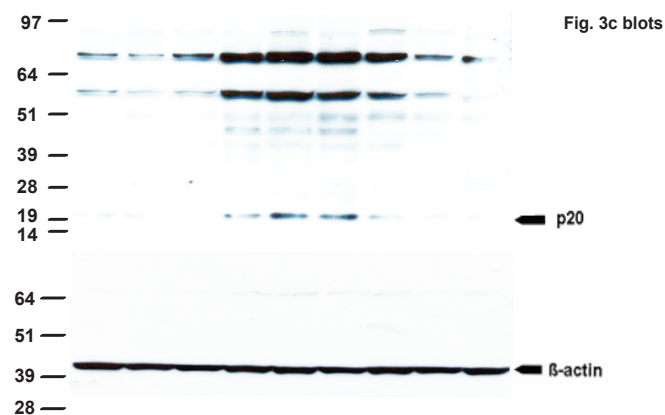

Supplementary Figure 5: Full Blots of Figures 1d, 2b, 2h and 3c together with the corresponding β-actin loading control blots.
